# Supplementary material for: Genome-Wide Analysis of Gene Families of Pattern Recognition Receptors in Fig Wasps (Hymenoptera, Chalcidoidea)
Source: MDPI journal article supplement (doi:10.3390/genes12121952), 2021-12-05
Supplement: s1 [file s1]

**Table S2.** Sequence characteristics of pattern recognition receptors in fig wasps.

| Gene name  | Gene family | Length (aa) | Isoelectric point | Molecular weight | Signal peptide | Transmembrane Region |
|------------|-------------|-------------|-------------------|------------------|----------------|----------------------|
| Abak_GNBP1 | GNBP        | 429         | 9.15              | 49018.77         | 1-23           | 9-26                 |
| Abak_GNBP2 | GNBP        | 355         | 6.67              | 40970.57         | /              | /                    |
| Sagr_GNBP1 | GNBP        | 119         | 5.27              | 13580.53         | 1-22           | 5-27/96-113          |
| Sagr_GNBP2 | GNBP        | 386         | 6.87              | 44403.5          | /              | /                    |
| Ptri_GNBP1 | GNBP        | 482         | 6.21              | 54958.73         | /              | /                    |
| Ptri_GNBP2 | GNBP        | 358         | 5.65              | 40635.76         | 1-27           | /                    |
| Sbsp_GNBP1 | GNBP        | 464         | 5.78              | 53260.85         | 1-22           | /                    |
| Sbsp_GNBP2 | GNBP        | 339         | 6.54              | 38848.12         | 1-25           | 5-27                 |
| Spsp_GNBP1 | GNBP        | 466         | 6.36              | 53653.11         | 1-19           | /                    |
| Spsp_GNBP2 | GNBP        | 359         | 6.11              | 40462.76         | 1-26           | /                    |
| Abak_Gal-1 | Galectin    | 336         | 7.17              | 39162.2          | /              | /                    |
| Abak_Gal-2 | Galectin    | 1374        | 6.41              | 153174.36        | /              | /                    |
| Abak_Gal-3 | Galectin    | 462         | 5.08              | 48728.83         | /              | /                    |
| Cfus_Gal-1 | Galectin    | 1366        | 6.08              | 152564.4         | /              | /                    |
| Cfus_Gal-2 | Galectin    | 431         | 8.95              | 49001.58         | /              | /                    |
| Cfus_Gal-3 | Galectin    | 444         | 5.13              | 47918.12         | /              | /                    |
| Csol_Gal-1 | Galectin    | 1172        | 5.79              | 130338.92        | /              | /                    |
| Csol_Gal-2 | Galectin    | 265         | 6.6               | 30482.29         | /              | /                    |
| Csol_Gal-3 | Galectin    | 423         | 5.38              | 45234.97         | /              | /                    |
| Dvas_Gal-1 | Galectin    | 337         | 7.95              | 38812.02         | /              | /                    |
| Dvas_Gal-2 | Galectin    | 454         | 5.31              | 48779.27         | /              | /                    |
| Dvas_Gal-3 | Galectin    | 1399        | 7.87              | 158668.92        | /              | /                    |
| Ekon_Gal-1 | Galectin    | 339         | 8.75              | 39276.46         | /              | /                    |
| Ekon_Gal-2 | Galectin    | 1347        | 6.21              | 151100.73        | /              | /                    |
| Ekon_Gal-3 | Galectin    | 445         | 5.56              | 48476.33         | /              | /                    |
| Kgib_Gal-1 | Galectin    | 1342        | 6.58              | 149082.48        | /              | /                    |
| Kgib_Gal-2 | Galectin    | 401         | 5.61              | 42792.47         |                |                      |
| Kgib_Gal-3 | Galectin    | 336         | 6.83              | 38566.55         | /              | /                    |
| Pcor_Gal-1 | Galectin    | 1331        | 6.4               | 149215.28        | /              | /                    |
| Pcor_Gal-2 | Galectin    | 450         | 5.33              | 48222.34         | /              | /                    |
| Pcor_Gal-3 | Galectin    | 335         | 7.57              | 38835            | /              | /                    |
| Ptri_Gal-1 | Galectin    | 357         | 8.03              | 41184.55         | /              | /                    |
| Ptri_Gal-2 | Galectin    | 466         | 5.06              | 49257.5          | /              | /                    |
| Ptri_Gal-3 | Galectin    | 1347        | 5.96              | 149994.2         | /              | /                    |
| Sagr_Gal-1 | Galectin    | 308         | 6.46              | 35878.43         | /              | /                    |
| Sagr_Gal-2 | Galectin    | 462         | 5.21              | 48706.76         | /              | /                    |
| Sagr_Gal-3 | Galectin    | 1347        | 6.24              | 150786.98        | /              | /                    |
| Sbsp_Gal-1 | Galectin    | 1344        | 6.4               | 150334.47        | /              | /                    |

| Gene name  | Gene family | Length (aa) | Isoelectric point | Molecular weight | Signal peptide | Transmembrane Region |
|------------|-------------|-------------|-------------------|------------------|----------------|----------------------|
| Sbsp_Gal-2 | Galectin    | 481         | 5.05              | 49659.69         | /              | /                    |
| Sbsp_Gal-3 | Galectin    | 369         | 6.48              | 42716.03         | /              | /                    |
| Spsp_Gal-1 | Galectin    | 1347        | 5.98              | 150567.12        | /              | /                    |
| Spsp_Gal-2 | Galectin    | 331         | 8.03              | 38503.54         | /              | /                    |
| Spsp_Gal-3 | Galectin    | 436         | 5.25              | 45194.14         | /              | /                    |
| Wpum_Gal-1 | Galectin    | 1346        | 6.34              | 150860.95        | /              | /                    |
| Wpum_Gal-2 | Galectin    | 453         | 5.37              | 48432.21         | /              | /                    |
| Wpum_Gal-3 | Galectin    | 336         | 7.12              | 38914.1          | /              | /                    |
| Abak_TEP-1 | TEP         | 1880        | 6.06              | 207875.6         | /              | /                    |
| Abak_TEP-2 | TEP         | 1706        | 6.47              | 195322.86        | /              | /                    |
| Abak_TEP-3 | TEP         | 1453        | 5.52              | 163324.74        | 1-21           | /                    |
| Cfus_TEP-1 | TEP         | 1452        | 5.7               | 163898.91        | 1-22           | /                    |
| Cfus_TEP-2 | TEP         | 1661        | 6.03              | 190961.14        | 1-19           | 1628-1650            |
| Cfus_TEP-3 | TEP         | 1907        | 5.64              | 210918.52        | /              | /                    |
| Csol_TEP-1 | TEP         | 1816        | 5.53              | 203041.58        | 1-18           | /                    |
| Csol_TEP-2 | TEP         | 1669        | 6.11              | 191557.67        | 1-20           | 1640-1658            |
| Csol_TEP-3 | TEP         | 1473        | 5.87              | 166005.19        | 1-22           | 7-29                 |
| Dvas_TEP-1 | TEP         | 1436        | 6.03              | 165509.24        | /              | /                    |
| Dvas_TEP-2 | TEP         | 1880        | 6.05              | 210123.36        | /              | 5-24                 |
| Dvas_TEP-3 | TEP         | 1487        | 5.77              | 167704.15        | 1-22           | /                    |
| Ekon_TEP-1 | TEP         | 1859        | 5.85              | 206252.15        | 1-19           | /                    |
| Ekon_TEP-2 | TEP         | 1317        | 5.67              | 147759.01        | /              | 1288-1310            |
| Ekon_TEP-3 | TEP         | 1668        | 6.18              | 192074.67        | 1-25           | 1635-1657            |
| Ekon_TEP-4 | TEP         | 380         | 8.56              | 43341.95         | /              | /                    |
| Kgib_TEP-1 | TEP         | 1658        | 6.28              | 190985.35        | 1-20           | 1628-1650            |
| Kgib_TEP-2 | TEP         | 1484        | 5.95              | 167849.16        | 1-22           | /                    |
| Pcor_TEP-1 | TEP         | 1855        | 5.88              | 206774.24        | 1-20           | /                    |
| Pcor_TEP-2 | TEP         | 1815        | 5.65              | 204002.64        | 1-22           | 7-29                 |
| Pcor_TEP-3 | TEP         | 1664        | 6.05              | 191788.13        | 1-21           | /                    |
| Ptri_TEP-1 | TEP         | 1680        | 6.19              | 192869.17        | 1-19           | /                    |
| Ptri_TEP-2 | TEP         | 1484        | 5.78              | 166211.95        | 1-20           | 7-29                 |
| Ptri_TEP-3 | TEP         | 1877        | 6.11              | 207327.05        | 1-18           | /                    |
| Sagr_TEP-1 | TEP         | 1477        | 5.83              | 166676.59        | 1-21           | /                    |
| Sagr_TEP-2 | TEP         | 1662        | 6.08              | 190738.9         | 1-19           | 1626-1648            |
| Sagr_TEP-3 | TEP         | 1862        | 5.8               | 207630.53        | 1-19           | /                    |
| Sbsp_TEP-1 | TEP         | 1681        | 6.18              | 193525.99        | 1-20           | 1648-1670            |
| Sbsp_TEP-2 | TEP         | 1498        | 6.5               | 169944.16        | /              | 13-35                |
| Sbsp_TEP-3 | TEP         | 1918        | 5.73              | 210609.36        | 1-24           | 7-29                 |
| Spsp_TEP-1 | TEP         | 1767        | 5.8               | 195268.23        | 1-19           | /                    |
| Spsp_TEP-2 | TEP         | 1647        | 6.17              | 189497.51        | 1-19           | 1624-1646            |

| Gene name   | Gene family | Length (aa) | Isoelectric point | Molecular weight | Signal peptide | Transmembrane Region                                                                        |
|-------------|-------------|-------------|-------------------|------------------|----------------|---------------------------------------------------------------------------------------------|
| Spsp_TEP-3  | TEP         | 1432        | 5.78              | 159976.2         | 1-19           | /                                                                                           |
| Spsp_TEP-4  | TEP         | 1605        | 5.91              | 184651.19        | 1-19           | 1581-1603                                                                                   |
| Wpum_TEP-1  | TEP         | 1457        | 5.97              | 164208.1         | 1-22           | /                                                                                           |
| Wpum_TEP-2  | TEP         | 1883        | 5.89              | 208809.85        | /              | 21-43                                                                                       |
| Wpum_TEP-3  | TEP         | 1663        | 6.16              | 191295.46        | 1-20           | /                                                                                           |
| Abak_CTL-1  | CTL-S       | 173         | 5.35              | 19581.89         | /              | /                                                                                           |
| Abak_CTL-2  | CTL-X       | 3535        | 5.22              | 386413.24        | /              | 3392-3414                                                                                   |
| Abak_CTL-3  | CTL-S       | 165         | 6.88              | 19001.77         | /              | /                                                                                           |
| Abak_CTL-4  | CTL-S       | 206         | 5.45              | 22757.76         | 1-19           | /                                                                                           |
| Abak_CTL-5  | CTL-S       | 204         | 5.02              | 22798.69         | 1-22           | /                                                                                           |
| Abak_CTL-6  | CTL-S       | 200         | 5.4               | 22809.88         | 1-21           | /                                                                                           |
| Abak_CTL-7  | CTL-S       | 222         | 5.89              | 24622.93         | 1-19           | /                                                                                           |
| Abak_CTL-8  | CTL-S       | 217         | 6.88              | 24576.74         | 1-17           | /                                                                                           |
| Abak_CTL-9  | CTL-S       | 183         | 5.12              | 21038.65         | 1-23           | /                                                                                           |
| Abak_CTL-10 | CTL-S       | 295         | 8.8               | 33002.42         | /              | /                                                                                           |
| Abak_CTL-11 | CTL-S       | 232         | 7.03              | 26602.05         | 1-19           | /                                                                                           |
| Abak_CTL-12 | CTL-X       | 1131        | 5.6               | 124565.98        | /              | 1012-1034                                                                                   |
| Abak_CTL-13 | CTL-S       | 403         | 5.27              | 46003.54         | /              | /                                                                                           |
| Abak_CTL-14 | CTL-X       | 787         | 6.2               | 85968.52         | 1-21           | 752-774                                                                                     |
| Abak_CTL-15 | CTL-S       | 193         | 5.08              | 21487.23         | /              | /                                                                                           |
| Abak_CTL-16 | CTL-X       | 1074        | 8.4               | 126827.44        | /              | 116-138/175-197/243-265<br>/275-297/339-361/376-395/402-424/462-484/505-527/583-605/612-634 |
| Abak_CTL-17 | CTL-S       | 215         | 8.5               | 24276.69         | 1-21           | /                                                                                           |
| Abak_CTL-18 | CTL-X       | 900         | 5.03              | 103103.34        | 1-20           | /                                                                                           |
| Abak_CTL-19 | CTL-X       | 893         | 5.22              | 99054.94         | /              | /                                                                                           |
| Abak_CTL-20 | CTL-S       | 283         | 8.4               | 31903.19         | 1-21           | /                                                                                           |
| Abak_CTL-21 | CTL-S       | 211         | 7.57              | 23518.92         | /              | 7-26                                                                                        |
| Cfus_CTL-1  | CTL-X       | 1311        | 6.23              | 143655.03        | 1-28           | 1192-1214                                                                                   |
| Cfus_CTL-2  | CTL-X       | 742         | 5.28              | 82713.84         | /              | 12-29                                                                                       |
| Cfus_CTL-3  | CTL-X       | 830         | 7.76              | 91267.02         | /              | 671-693                                                                                     |
| Cfus_CTL-4  | CTL-X       | 3556        | 5.35              | 388592.24        | 1-23           | 3413-3435                                                                                   |
| Cfus_CTL-5  | CTL-S       | 218         | 8.45              | 24815.75         | 1-18           | /                                                                                           |
| Cfus_CTL-6  | CTL-S       | 217         | 8.1               | 24788.01         | 1-17           | /                                                                                           |
| Cfus_CTL-7  | CTL-S       | 230         | 7.56              | 26350.86         | 1-17           | /                                                                                           |
| Cfus_CTL-8  | CTL-S       | 139         | 5.49              | 16593.45         | /              | /                                                                                           |
| Cfus_CTL-9  | CTL-S       | 213         | 5.51              | 23321.24         | 1-19           | /                                                                                           |
| Cfus_CTL-10 | CTL-S       | 228         | 5.72              | 25322.9          | /              | 12-34                                                                                       |
| Cfus_CTL-11 | CTL-S       | 233         | 5.69              | 24925.29         | 1-17           | /                                                                                           |

| Gene name   | Gene family | Length (aa) | Isoelectric point | Molecular weight | Signal peptide | Transmembrane Region |
|-------------|-------------|-------------|-------------------|------------------|----------------|----------------------|
| Cfus_CTL-12 | IML         | 534         | 4.99              | 59636.17         | /              | /                    |
| Cfus_CTL-13 | CTL-S       | 213         | 4.39              | 23503.48         | 1-19           | /                    |
| Cfus_CTL-14 | CTL-S       | 213         | 4.48              | 23418.48         | 1-19           | /                    |
| Cfus_CTL-15 | IML         | 484         | 4.75              | 53598.14         | 1-19           | /                    |
| Cfus_CTL-16 | CTL-S       | 214         | 8.7               | 24386.91         | 1-20           | /                    |
| Cfus_CTL-17 | CTL-S       | 213         | 4.42              | 23048.83         | 1-19           | /                    |
| Cfus_CTL-18 | CTL-S       | 213         | 4.4               | 22949.76         | 1-19           | /                    |
| Cfus_CTL-19 | CTL-S       | 213         | 4.58              | 22941.87         | 1-19           | /                    |
| Cfus_CTL-20 | CTL-X       | 394         | 6.88              | 45015.53         | 1-26           | 7-26                 |
| Cfus_CTL-21 | CTL-S       | 223         | 7.59              | 25943.69         | 1-16           | /                    |
| Cfus_CTL-22 | CTL-X       | 2090        | 10.1              | 220417.02        | 1-20           | /                    |
| Cfus_CTL-23 | CTL-S       | 254         | 8.5               | 28604.77         | /              | /                    |
| Csol_CTL-1  | CTL-X       | 927         | 5.72              | 103539.74        | /              | /                    |
| Csol_CTL-2  | CTL-S       | 156         | 9.5               | 18241.2          | /              | /                    |
| Csol_CTL-3  | CTL-S       | 214         | 6.82              | 24986.45         | /              | /                    |
| Csol_CTL-4  | CTL-X       | 663         | 6.61              | 72468.39         | /              | 639-661              |
| Csol_CTL-5  | CTL-S       | 194         | 5.86              | 22529.24         | /              | /                    |
| Csol_CTL-6  | CTL-S       | 122         | 6.48              | 13305.24         | /              | /                    |
| Csol_CTL-7  | CTL-S       | 100         | 4.43              | 11020.27         | /              | /                    |
| Csol_CTL-8  | IML         | 293         | 5.03              | 32842.98         | /              | /                    |
| Csol_CTL-9  | CTL-S       | 142         | 5.75              | 15972.54         | /              | /                    |
| Csol_CTL-10 | CTL-S       | 163         | 5.96              | 18735.25         | /              | /                    |
| Csol_CTL-11 | CTL-S       | 163         | 8.51              | 17931.31         | 1-25           | /                    |
| Csol_CTL-12 | CTL-X       | 1092        | 5.51              | 119881.22        | /              | 973-995              |
| Csol_CTL-13 | CTL-S       | 174         | 8.65              | 19383.04         | /              | /                    |
| Csol_CTL-14 | CTL-X       | 2330        | 5.27              | 254588.72        | /              | /                    |
| Csol_CTL-15 | CTL-S       | 134         | 5.06              | 15836.65         | /              | /                    |
| Csol_CTL-16 | CTL-S       | 217         | 8.1               | 24832.11         | 1-17           | /                    |
| Csol_CTL-17 | CTL-S       | 329         | 10.23             | 38624.01         | /              | /                    |
| Dvas_CTL-1  | CTL-S       | 217         | 8.1               | 25012.43         | 1-17           | /                    |
| Dvas_CTL-2  | CTL-X       | 1487        | 8.13              | 165250.46        | /              | 1368-1390            |
| Dvas_CTL-3  | CTL-S       | 180         | 5.11              | 20772.21         | 1-20           | /                    |
| Dvas_CTL-4  | CTL-S       | 207         | 5.53              | 22096.21         | /              | /                    |
| Dvas_CTL-5  | CTL-X       | 3625        | 5.3               | 396993.43        | 1-23           | 3482-3504            |
| Dvas_CTL-6  | CTL-S       | 289         | 8.31              | 33526.72         | /              | /                    |
| Dvas_CTL-7  | CTL-S       | 835         | 5.66              | 97573.35         | /              | /                    |
| Dvas_CTL-8  | CTL-S       | 692         | 5.13              | 78029.16         | /              | /                    |
| Dvas_CTL-9  | IML         | 364         | 6.28              | 42986.23         | /              | /                    |
| Dvas_CTL-10 | CTL-S       | 230         | 7.03              | 26469.93         | 1-17           | /                    |
| Dvas_CTL-11 | CTL-S       | 217         | 8.45              | 24773.72         | 1-17           | /                    |

| Gene name   | Gene family | Length (aa) | Isoelectric point | Molecular weight | Signal peptide | Transmembrane Region    |
|-------------|-------------|-------------|-------------------|------------------|----------------|-------------------------|
| Dvas_CTL-12 | CTL-X       | 834         | 8.45              | 91651.39         | /              | 673-695                 |
| Dvas_CTL-13 | CTL-S       | 216         | 4.94              | 24680.97         | /              | /                       |
| Dvas_CTL-14 | CTL-S       | 194         | 6.15              | 22444.97         | /              | /                       |
| Dvas_CTL-15 | CTL-S       | 356         | 10.13             | 40800.5          | 1-21           | 202-224/300-322/332-349 |
| Dvas_CTL-16 | CTL-S       | 275         | 8.54              | 30690.78         | /              | /                       |
| Dvas_CTL-17 | CTL-S       | 222         | 4.15              | 25133.06         | 1-21           | /                       |
| Dvas_CTL-18 | CTL-S       | 107         | 4.39              | 12317.85         | /              | /                       |
| Dvas_CTL-19 | IML         | 472         | 8.24              | 54811.86         | /              | /                       |
| Dvas_CTL-20 | CTL-X       | 1221        | 7.26              | 139562.73        | /              | /                       |
| Ekon_CTL-1  | CTL-S       | 217         | 7.55              | 24821.08         | 1-16           | /                       |
| Ekon_CTL-2  | CTL-S       | 251         | 6.37              | 29170.83         | 1-15           | /                       |
| Ekon_CTL-3  | CTL-S       | 196         | 8.77              | 23002.84         | 1-18           | /                       |
| Ekon_CTL-4  | CTL-S       | 302         | 8.3               | 33961.73         | 1-18           | /                       |
| Ekon_CTL-5  | CTL-S       | 660         | 7.47              | 75448.39         | /              | /                       |
| Ekon_CTL-6  | CTL-S       | 187         | 4.57              | 21189.65         | 1-20           | /                       |
| Ekon_CTL-7  | CTL-S       | 187         | 4.79              | 21234.94         | 1-20           | /                       |
| Ekon_CTL-8  | CTL-X       | 990         | 6.23              | 115358.55        | /              | /                       |
| Ekon_CTL-9  | CTL-S       | 282         | 8.45              | 31891.52         | 1-19           | /                       |
| Ekon_CTL-10 | CTL-S       | 149         | 6.17              | 17170.13         | 1-20           | /                       |
| Ekon_CTL-11 | CTL-X       | 1086        | 5.53              | 119421.59        | /              | 967-989                 |
| Ekon_CTL-12 | CTL-S       | 230         | 7.03              | 26369.81         | 1-17           | /                       |
| Ekon_CTL-13 | CTL-S       | 183         | 4.14              | 20825.41         | 1-24           | /                       |
| Ekon_CTL-14 | CTL-S       | 184         | 4.48              | 21151.86         | 1-24           | /                       |
| Ekon_CTL-15 | CTL-X       | 792         | 8.09              | 87412.61         | /              | 631-653                 |
| Ekon_CTL-16 | CTL-S       | 252         | 6.94              | 29211.69         | 1-24           | /                       |
| Ekon_CTL-17 | CTL-S       | 120         | 4.51              | 14220.44         | /              | /                       |
| Ekon_CTL-18 | CTL-X       | 501         | 7.76              | 59341.82         | /              | /                       |
| Ekon_CTL-19 | CTL-S       | 217         | 8.45              | 24676.63         | 1-17           | /                       |
| Ekon_CTL-20 | CTL-S       | 141         | 5.44              | 16185.88         | /              | /                       |
| Ekon_CTL-21 | CTL-S       | 218         | 5.55              | 24755.47         | 1-25           | 7-29                    |
| Ekon_CTL-22 | CTL-S       | 253         | 8.07              | 28609.78         | /              | /                       |
| Ekon_CTL-23 | CTL-S       | 218         | 5.57              | 23955.27         | 1-17           | /                       |
| Ekon_CTL-24 | CTL-S       | 243         | 5.49              | 28727.45         | 1-19           | 5-22                    |
| Ekon_CTL-25 | CTL-X       | 1831        | 5.48              | 206078.35        | /              | /                       |
| Kgib_CTL-1  | CTL-X       | 1373        | 5.53              | 151271.34        | 1-24           | 1005-1027               |
| Kgib_CTL-2  | CTL-S       | 217         | 8.11              | 24813.12         | 1-17           | /                       |
| Kgib_CTL-3  | CTL-S       | 213         | 8.34              | 24252.72         | /              | /                       |
| Kgib_CTL-4  | CTL-X       | 795         | 6.08              | 93206.25         | /              | /                       |
| Kgib_CTL-5  | CTL-S       | 251         | 9.19              | 27166.75         | /              | /                       |
| Kgib_CTL-6  | CTL-S       | 180         | 5.22              | 20910.44         | 1-20           | /                       |

| Gene name   | Gene family | Length (aa) | Isoelectric point | Molecular weight | Signal peptide | Transmembrane Region |
|-------------|-------------|-------------|-------------------|------------------|----------------|----------------------|
| Kgib_CTL-7  | CTL-S       | 523         | 6.62              | 61462.32         | /              | /                    |
| Kgib_CTL-8  | CTL-S       | 226         | 5.95              | 24628.26         | 1-27           | /                    |
| Kgib_CTL-9  | CTL-X       | 905         | 6.62              | 99511.43         | 1-22           | 748-770              |
| Kgib_CTL-10 | CTL-S       | 189         | 9.28              | 22335.6          | /              | 5-24                 |
| Kgib_CTL-11 | CTL-S       | 217         | 8.45              | 24680.62         | 1-17           | /                    |
| Kgib_CTL-12 | CTL-S       | 230         | 7.6               | 26430.96         | 1-17           | /                    |
| Kgib_CTL-13 | CTL-S       | 412         | 5.03              | 46947.41         | 1-17           | /                    |
| Kgib_CTL-14 | CTL-X       | 748         | 5.48              | 82212.14         | /              | /                    |
| Kgib_CTL-15 | CTL-X       | 3569        | 5.33              | 390527.05        | /              | 3426-3448            |
| Pcor_CTL-1  | CTL-X       | 1138        | 6.06              | 124646.95        | /              | 1019-1041            |
| Pcor_CTL-2  | CTL-S       | 151         | 4.61              | 17531.66         | /              | /                    |
| Pcor_CTL-3  | CTL-S       | 274         | 4.95              | 30958.3          | 1-19           | /                    |
| Pcor_CTL-4  | CTL-S       | 429         | 9.58              | 48861.8          | /              | /                    |
| Pcor_CTL-5  | CTL-S       | 198         | 4.56              | 21777.35         | 1-18           | /                    |
| Pcor_CTL-6  | CTL-S       | 197         | 4.45              | 22043.62         | 1-18           | /                    |
| Pcor_CTL-7  | CTL-S       | 153         | 5.24              | 17693.73         | /              | /                    |
| Pcor_CTL-8  | CTL-S       | 200         | 8.45              | 22686.86         | 1-18           | /                    |
| Pcor_CTL-9  | CTL-S       | 149         | 4.88              | 16377.41         | 1-18           | /                    |
| Pcor_CTL-10 | CTL-S       | 270         | 8.82              | 29105.33         | 1-22           | /                    |
| Pcor_CTL-11 | CTL-S       | 198         | 5.59              | 22009.84         | 1-18           | /                    |
| Pcor_CTL-12 | CTL-S       | 198         | 5.3               | 21936.91         | 1-18           | /                    |
| Pcor_CTL-13 | CTL-S       | 262         | 9.77              | 30074.43         | 1-18           | /                    |
| Pcor_CTL-14 | CTL-S       | 197         | 4.92              | 21928.76         | 1-18           | /                    |
| Pcor_CTL-15 | CTL-S       | 198         | 4.78              | 22109.84         | 1-18           | /                    |
| Pcor_CTL-16 | CTL-S       | 914         | 4.47              | 101996.86        | 1-21           | /                    |
| Pcor_CTL-17 | CTL-S       | 258         | 8.14              | 29687.52         | /              | 15-37/44-63          |
| Pcor_CTL-18 | CTL-S       | 221         | 6.09              | 25578.58         | /              | /                    |
| Pcor_CTL-19 | CTL-S       | 230         | 7.03              | 26354.79         | 1-17           | /                    |
| Pcor_CTL-20 | CTL-X       | 3592        | 5.29              | 393541.37        | 1-23           | 3449-3471            |
| Pcor_CTL-21 | CTL-S       | 217         | 8.1               | 24994.34         | 1-17           | /                    |
| Pcor_CTL-22 | CTL-X       | 909         | 7.31              | 99294.97         | 1-24           | 748-770              |
| Pcor_CTL-23 | CTL-S       | 556         | 9.7               | 63339.58         | /              | /                    |
| Pcor_CTL-24 | CTL-S       | 215         | 5.27              | 24179.56         | 1-21           | /                    |
| Ptri_CTL-1  | CTL-S       | 295         | 8.83              | 33272.08         | /              | /                    |
| Ptri_CTL-2  | CTL-S       | 730         | 7.47              | 81131.04         | 1-23           | /                    |
| Ptri_CTL-3  | CTL-X       | 1064        | 5.63              | 117311.5         | /              | 945-967              |
| Ptri_CTL-4  | CTL-S       | 221         | 5.66              | 24105.27         | 1-17           | /                    |
| Ptri_CTL-5  | CTL-S       | 239         | 6.3               | 26907.57         | /              | /                    |
| Ptri_CTL-6  | CTL-X       | 879         | 5.58              | 101139.51        | 1-24           | /                    |
| Ptri_CTL-7  | CTL-S       | 206         | 5.96              | 23301.38         | 1-18           | /                    |

| Gene name   | Gene family | Length (aa) | Isoelectric point | Molecular weight | Signal peptide | Transmembrane Region                                                                        |
|-------------|-------------|-------------|-------------------|------------------|----------------|---------------------------------------------------------------------------------------------|
| Ptri_CTL-8  | CTL-S       | 211         | 6.23              | 23585.7          | /              | /                                                                                           |
| Ptri_CTL-9  | CTL-X       | 1343        | 8.11              | 154910.18        | /              | 29-51/61-80/127-149/164-186/244-266/276-298/327-344/1030-1052/1120-1142/1162-1184/1247-1269 |
| Ptri_CTL-10 | CTL-S       | 183         | 5.13              | 21030.65         | 1-23           | /                                                                                           |
| Ptri_CTL-11 | CTL-S       | 225         | 5.51              | 25513.7          | /              | /                                                                                           |
| Ptri_CTL-12 | CTL-S       | 542         | 8.64              | 61437.32         | /              | /                                                                                           |
| Ptri_CTL-13 | CTL-S       | 271         | 5.82              | 29554.66         | 1-22           | /                                                                                           |
| Ptri_CTL-14 | CTL-X       | 1071        | 8.87              | 115564.76        | 1-19           | 749-771                                                                                     |
| Ptri_CTL-15 | CTL-S       | 216         | 7.55              | 24602.83         | 1-16           | /                                                                                           |
| Ptri_CTL-16 | CTL-S       | 347         | 8.31              | 38789.08         | /              | /                                                                                           |
| Ptri_CTL-17 | CTL-X       | 3580        | 5.28              | 391751.54        | 1-23           | 3437-3459                                                                                   |
| Ptri_CTL-18 | IML         | 410         | 5.36              | 46371.14         | 1-22           | /                                                                                           |
| Ptri_CTL-19 | CTL-S       | 207         | 4.86              | 22784.61         | 1-20           | /                                                                                           |
| Ptri_CTL-20 | CTL-S       | 213         | 6.08              | 24149.75         | 1-18           | /                                                                                           |
| Ptri_CTL-21 | CTL-S       | 203         | 9                 | 22513.75         | 1-28           | 13-35                                                                                       |
| Ptri_CTL-22 | CTL-S       | 210         | 7.02              | 23195.33         | 1-20           | /                                                                                           |
| Ptri_CTL-23 | CTL-S       | 110         | 8.99              | 13022.84         | /              | /                                                                                           |
| Ptri_CTL-24 | CTL-S       | 218         | 8.45              | 24760.71         | 1-18           | /                                                                                           |
| Ptri_CTL-25 | CTL-S       | 232         | 7.03              | 26570.06         | 1-19           | /                                                                                           |
| Ptri_CTL-26 | CTL-X       | 2188        | 5.56              | 241749.79        | /              | /                                                                                           |
| Ptri_CTL-27 | CTL-X       | 1224        | 6.33              | 139595.57        | 1-19           | /                                                                                           |
| Sagr_CTL-1  | CTL-S       | 107         | 6.56              | 12632.56         | /              | /                                                                                           |
| Sagr_CTL-2  | CTL-S       | 149         | 6.7               | 17382.84         | 1-20           | /                                                                                           |
| Sagr_CTL-3  | CTL-S       | 186         | 6.7               | 21788.72         | 1-23           | /                                                                                           |
| Sagr_CTL-4  | CTL-S       | 295         | 8.86              | 33807.57         | 1-23           | /                                                                                           |
| Sagr_CTL-5  | CTL-S       | 349         | 9.31              | 40324.54         | /              | 9-31                                                                                        |
| Sagr_CTL-6  | CTL-S       | 217         | 8.46              | 24618.55         | 1-17           | /                                                                                           |
| Sagr_CTL-7  | CTL-X       | 1370        | 10.03             | 149746.18        | /              | /                                                                                           |
| Sagr_CTL-8  | CTL-S       | 216         | 9.08              | 24876.92         | 1-24           | /                                                                                           |
| Sagr_CTL-9  | CTL-S       | 504         | 9.74              | 55834.74         | 1-25           | /                                                                                           |
| Sagr_CTL-10 | CTL-S       | 230         | 7.59              | 26307.77         | 1-17           | /                                                                                           |
| Sagr_CTL-11 | CTL-S       | 217         | 7.56              | 24753.97         | 1-17           | /                                                                                           |
| Sagr_CTL-12 | CTL-X       | 812         | 7.74              | 89192.37         | /              | 662-684                                                                                     |
| Sagr_CTL-13 | CTL-S       | 396         | 9.42              | 43203.28         | 1-21           | /                                                                                           |
| Sagr_CTL-14 | CTL-S       | 178         | 4.92              | 20671.28         | 1-22           | /                                                                                           |
| Sagr_CTL-15 | CTL-S       | 224         | 8.26              | 25500.2          | 1-26           | /                                                                                           |
| Sbsp_CTL-1  | CTL-S       | 197         | 6.98              | 22302.56         | 1-21           | /                                                                                           |
| Sbsp_CTL-2  | CTL-X       | 964         | 7.03              | 105065.2         | /              | 794-816                                                                                     |

| Gene name   | Gene family | Length (aa) | Isoelectric point | Molecular weight | Signal peptide | Transmembrane Region                        |
|-------------|-------------|-------------|-------------------|------------------|----------------|---------------------------------------------|
| Sbsp_CTL-3  | CTL-S       | 219         | 8.46              | 24779.71         | 1-19           | /                                           |
| Sbsp_CTL-4  | CTL-S       | 224         | 6.44              | 24457.81         | /              | 5-27                                        |
| Sbsp_CTL-5  | CTL-S       | 226         | 6.74              | 24054.51         | /              | /                                           |
| Sbsp_CTL-6  | CTL-S       | 278         | 8.63              | 31346.06         | 1-21           | /                                           |
| Sbsp_CTL-7  | CTL-S       | 199         | 7.97              | 22602.06         | 1-21           | /                                           |
| Sbsp_CTL-8  | CTL-S       | 199         | 6.87              | 22368.7          | 1-21           | /                                           |
| Sbsp_CTL-9  | CTL-S       | 164         | 5.91              | 18445.12         | 1-17           | /                                           |
| Sbsp_CTL-10 | CTL-X       | 4427        | 5.34              | 487570.36        | /              | 7-29/4284-4306                              |
| Sbsp_CTL-11 | CTL-X       | 1119        | 5.7               | 123134.88        | /              | 1000-1022                                   |
| Sbsp_CTL-12 | CTL-S       | 284         | 8.95              | 32985.66         | /              | /                                           |
| Sbsp_CTL-13 | CTL-S       | 219         | 7.55              | 24794.1          | 1-17           | /                                           |
| Sbsp_CTL-14 | CTL-S       | 106         | 5.64              | 12201.82         | /              | /                                           |
| Sbsp_CTL-15 | CTL-S       | 301         | 9.42              | 32776.21         | /              | /                                           |
| Sbsp_CTL-16 | CTL-S       | 230         | 5.83              | 26474.61         | 1-20           | /                                           |
| Sbsp_CTL-17 | CTL-X       | 2152        | 5.54              | 240281.68        | 1-24           | /                                           |
| Sbsp_CTL-18 | CTL-X       | 1225        | 6.45              | 139721.9         | /              | /                                           |
| Spsp_CTL-1  | CTL-S       | 217         | 8.46              | 24681.6          | 1-17           | /                                           |
| Spsp_CTL-2  | CTL-S       | 179         | 6.7               | 20854.75         | 1-20           | /                                           |
| Spsp_CTL-3  | CTL-S       | 260         | 9.19              | 29296.64         | 1-21           | /                                           |
| Spsp_CTL-4  | CTL-X       | 1116        | 5.82              | 122372.11        | /              | 997-1019                                    |
| Spsp_CTL-5  | CTL-X       | 915         | 7.3               | 100517.74        | 1-28           | 762-784                                     |
| Spsp_CTL-6  | CTL-S       | 253         | 6.52              | 28791.56         | 1-16           | /                                           |
| Spsp_CTL-7  | CTL-S       | 275         | 9.26              | 30798.99         | 1-18           | 240-262<br>900-922/991-1013/1033-1          |
| Spsp_CTL-8  | CTL-X       | 1236        | 5.95              | 141238.22        | /              | 054/1105-1127/1137-1156<br>/1199-1218       |
| Spsp_CTL-9  | CTL-S       | 226         | 4.88              | 25654.07         | 1-18           | /                                           |
| Spsp_CTL-10 | CTL-X       | 496         | 6.46              | 56585.81         | /              | 41-63/73-95/129-151/190-212/267-289/299-321 |
| Spsp_CTL-11 | CTL-S       | 126         | 4.87              | 14687.56         | /              | /                                           |
| Spsp_CTL-12 | CTL-S       | 205         | 5.29              | 22750.53         | 1-18           | /                                           |
| Spsp_CTL-13 | CTL-S       | 183         | 5.71              | 20738.79         | /              | /                                           |
| Spsp_CTL-14 | CTL-S       | 205         | 5.51              | 23221.33         | 1-19           | /                                           |
| Spsp_CTL-15 | CTL-S       | 182         | 4.83              | 20150.56         | /              | /                                           |
| Spsp_CTL-16 | CTL-S       | 217         | 6.03              | 23646.88         | 1-17           | /                                           |
| Spsp_CTL-17 | CTL-S       | 229         | 5.85              | 25253.29         | /              | /                                           |
| Spsp_CTL-18 | CTL-X       | 584         | 5.98              | 67051.41         | /              | /                                           |
| Spsp_CTL-19 | CTL-S       | 220         | 7.58              | 24935.7          | /              | /                                           |
| Spsp_CTL-20 | CTL-X       | 854         | 5.1               | 98011.21         | 1-22           | /                                           |
| Spsp_CTL-21 | CTL-S       | 283         | 8.61              | 31935.19         | 1-19           | /                                           |



| Gene name   | Gene family | Length (aa) | Isoelectric point | Molecular weight | Signal peptide | Transmembrane Region |
|-------------|-------------|-------------|-------------------|------------------|----------------|----------------------|
| Spsp_CTL-22 | CTL-S       | 331         | 6.42              | 37826.05         | /              | /                    |
| Spsp_CTL-23 | CTL-S       | 182         | 5.01              | 20888.47         | 1-22           | /                    |
| Spsp_CTL-24 | CTL-X       | 4175        | 5.47              | 456882.83        | /              | 3439-3461            |
| Spsp_CTL-25 | CTL-S       | 348         | 10.15             | 40332.07         | 1-19           | /                    |
| Spsp_CTL-26 | CTL-X       | 2170        | 5.4               | 240471.94        | 1-20           | /                    |
| Wpum_CTL-1  | CTL-S       | 217         | 8.45              | 24787.75         | 1-17           | /                    |
| Wpum_CTL-2  | IML         | 363         | 9.02              | 41267.99         | /              | /                    |
| Wpum_CTL-3  | CTL-S       | 281         | 8.57              | 32458.09         | /              | /                    |
| Wpum_CTL-4  | CTL-S       | 207         | 6.59              | 24051.95         | /              | /                    |
| Wpum_CTL-5  | CTL-S       | 219         | 6.64              | 25710.66         | 1-21           | /                    |
| Wpum_CTL-6  | CTL-X       | 728         | 5.25              | 81535.11         | /              | /                    |
| Wpum_CTL-7  | CTL-S       | 217         | 8.1               | 25127.69         | 1-17           | /                    |
| Wpum_CTL-8  | CTL-S       | 180         | 5.02              | 20681.13         | 1-20           | /                    |
| Wpum_CTL-9  | CTL-S       | 188         | 5.26              | 21188.95         | 1-22           | /                    |
| Wpum_CTL-10 | CTL-S       | 183         | 6.21              | 20940.77         | 1-18           | /                    |
| Wpum_CTL-11 | CTL-S       | 188         | 5.26              | 21188.95         | 1-22           | /                    |
| Wpum_CTL-12 | CTL-X       | 1208        | 5.58              | 133537.51        | /              | 1001-1023            |
| Wpum_CTL-13 | CTL-X       | 818         | 5.73              | 95697.61         | /              | /                    |
| Wpum_CTL-14 | CTL-X       | 910         | 7.51              | 99456.3          | 1-20           | 7-29/748-770         |
| Wpum_CTL-15 | CTL-S       | 707         | 8.73              | 82304.84         | /              | /                    |
| Wpum_CTL-16 | CTL-X       | 3566        | 5.3               | 390236.17        | 1-23           | 3423-3445            |
| Wpum_CTL-17 | CTL-S       | 219         | 5.61              | 23505.79         | 1-17           | /                    |
| Wpum_CTL-18 | CTL-S       | 213         | 8.79              | 24246.59         | /              | /                    |
| Wpum_CTL-19 | CTL-X       | 552         | 6.52              | 61347.57         | /              | /                    |
| AbakSCR-B1  | SCRB        | 503         | 7.86              | 56948.77         | /              | 7-29/474-496         |
| AbakSCR-B2  | SCRB        | 590         | 7.6               | 66830.46         | /              | 65-87/498-520        |
| AbakSCR-B3  | SCRB        | 538         | 7.07              | 61506.67         | /              | 34-56/480-502        |
| AbakSCR-B4  | SCRB        | 522         | 8.28              | 56956.01         | /              | 19-41/459-481        |
| AbakSCR-B5  | SCRB        | 579         | 6.69              | 66442.8          | /              | 9-28/485-507         |
| AbakSCR-B6  | SCRB        | 563         | 5.83              | 63277.85         | /              | 77-99/509-531        |
| AbakSCR-B7  | SCRB        | 523         | 7.06              | 58804.42         | /              | 7-29/455-477         |
| AbakSCR-B8  | SCRB        | 539         | 8.4               | 61180.32         | /              | 12-34/463-485        |
| AbakSCR-B9  | SCRB        | 542         | 5.38              | 61949.22         | /              | 13-32/469-491        |
| AbakSCR-B10 | SCRB        | 604         | 5.92              | 69562.26         | /              | 77-99/507-529        |
| AbakSCR-B11 | SCRB        | 531         | 8.3               | 59574.13         | /              | 9-31                 |
| CfusSCR-B1  | SCRB        | 525         | 9                 | 59495.34         | /              | 9-31/462-484         |
| CfusSCR-B2  | SCRB        | 554         | 6.4               | 63602.79         | /              | 9-28/485-507         |
| CfusSCR-B3  | SCRB        | 562         | 7                 | 63942.81         | /              | 85-107/514-536       |
| CfusSCR-B4  | SCRB        | 629         | 7.9               | 72040.48         | /              | 103-125/537-559      |
| CfusSCR-B5  | SCRB        | 537         | 5.72              | 60850.6          | /              | 13-35/462-484        |

| Gene name   | Gene family | Length (aa) | Isoelectric point | Molecular weight | Signal peptide | Transmembrane Region |
|-------------|-------------|-------------|-------------------|------------------|----------------|----------------------|
| CfusSCR-B6  | SCRB        | 588         | 8.44              | 66098.62         | /              | 63-85/493-515        |
| CfusSCR-B7  | SCRB        | 545         | 8.17              | 60787.41         | /              | 7-26/449-471         |
| CfusSCR-B8  | SCRB        | 544         | 9.16              | 61895.58         | /              | 32-54                |
| CfusSCR-B9  | SCRB        | 525         | 8.25              | 58097.57         | /              | 20-42/459-481        |
| CfusSCR-B10 | SCRB        | 499         | 8.31              | 56873.96         | /              | 9-31/470-492         |
| DvasSCR-B1  | SCRB        | 473         | 8.82              | 54191.53         | /              | 443-465              |
| DvasSCR-B2  | SCRB        | 588         | 8.25              | 66075.61         | /              | 63-85                |
| DvasSCR-B3  | SCRB        | 537         | 5.98              | 61270.14         | /              | 13-35/462-484        |
| DvasSCR-B4  | SCRB        | 524         | 8.25              | 59256.26         | /              | 32-54/479-498        |
| DvasSCR-B5  | SCRB        | 522         | 8.28              | 57945.26         | /              | 19-41/459-481        |
| DvasSCR-B6  | SCRB        | 668         | 8.89              | 76268.13         | /              | 143-165/573-595      |
| DvasSCR-B7  | SCRB        | 486         | 8.2               | 54905.56         | /              | 7-29/439-461         |
| DvasSCR-B8  | SCRB        | 555         | 5.94              | 63623.62         | /              | 9-28/481-503         |
| DvasSCR-B9  | SCRB        | 490         | 8.82              | 55628.56         | /              | 9-31/463-481         |
| DvasSCR-B10 | SCRB        | 572         | 8.67              | 65747.2          | /              | /                    |
| DvasSCR-B11 | SCRB        | 519         | 6.16              | 59050.91         | /              | 7-29/454-476         |
| EkonSCR-B1  | SCRB        | 617         | 7.48              | 69833.89         | /              | 136-158/567-589      |
| EkonSCR-B2  | SCRB        | 522         | 7.58              | 59201.06         | /              | 7-29/452-474         |
| EkonSCR-B3  | SCRB        | 522         | 8.8               | 59228.06         | /              | 9-31/461-479         |
| EkonSCR-B4  | SCRB        | 550         | 5.14              | 62557.95         | /              | 28-50/476-498        |
| EkonSCR-B5  | SCRB        | 551         | 5.82              | 63072.11         | /              | 7-29/481-503         |
| EkonSCR-B6  | SCRB        | 735         | 6.76              | 83664.72         | /              | 212-234/641-663      |
| EkonSCR-B7  | SCRB        | 522         | 8.28              | 57763.12         | /              | 19-41/459-481        |
| EkonSCR-B8  | SCRB        | 523         | 8.6               | 59161.09         | /              | 32-54/479-498        |
| EkonSCR-B9  | SCRB        | 487         | 7.12              | 55906.64         | /              | 455-477              |
| EkonSCR-B10 | SCRB        | 767         | 8.86              | 86015.27         | /              | 242-264/672-694      |
| KgibSCR-B1  | SCRB        | 503         | 6.29              | 57302.22         | /              | 9-28/468-490         |
| KgibSCR-B2  | SCRB        | 554         | 5.78              | 63666.57         | /              | 9-28/485-507         |
| KgibSCR-B3  | SCRB        | 550         | 8.86              | 62234.68         | /              | 79-101/501-523       |
| KgibSCR-B4  | SCRB        | 583         | 5.53              | 66730.05         | /              | 55-77/485-507        |
| KgibSCR-B5  | SCRB        | 525         | 7.98              | 58009.39         | /              | 19-41/459-481        |
| KgibSCR-B6  | SCRB        | 526         | 8.24              | 59858.75         | /              | 32-54/479-500        |
| KgibSCR-B7  | SCRB        | 537         | 5.45              | 60985.77         | /              | 13-35/462-484        |
| KgibSCR-B8  | SCRB        | 588         | 7.13              | 66370.01         | /              | 63-85/492-514        |
| KgibSCR-B9  | SCRB        | 531         | 8.66              | 60401.95         | /              | 487-509              |
| KgibSCR-B10 | SCRB        | 522         | 7.94              | 59136.92         | /              | 7-26/454-476         |
| PcorSCR-B1  | SCRB        | 590         | 5.63              | 67113.19         | /              | 65-87/494-516        |
| PcorSCR-B   | SCRB        | 554         | 5.29              | 63373.41         | /              | 33-55/481-503        |
| PcorSCR-B3  | SCRB        | 522         | 8.47              | 57718.27         | /              | 19-41/459-481        |
| PcorSCR-B4  | SCRB        | 489         | 8.56              | 55633.51         | /              | 7-29/439-461         |

| Gene name   | Gene family | Length (aa) | Isoelectric point | Molecular weight | Signal peptide | Transmembrane Region  |
|-------------|-------------|-------------|-------------------|------------------|----------------|-----------------------|
| PcorSCR-B5  | SCRB        | 489         | 6.28              | 56006.29         | /              | 429-451               |
| PcorSCR-B6  | SCRB        | 535         | 8.11              | 60749.21         | /              | 9-31                  |
| PcorSCR-B7  | SCRB        | 659         | 8.66              | 74542.71         | /              | 595-617               |
| PcorSCR-B8  | SCRB        | 513         | 8.34              | 57959.59         | /              | 7-29/458-475          |
| PcorSCR-B9  | SCRB        | 588         | 6.84              | 66178.62         | /              | 63-85                 |
| PcorSCR-B10 | SCRB        | 554         | 6.06              | 63271.25         | /              | 9-28/485-507          |
| PcorSCR-B11 | SCRB        | 285         | 5.94              | 31984.53         | /              | 240-259               |
| PcorSCR-B12 | SCRB        | 463         | 9.36              | 52208.35         | /              | 32-54                 |
| PtriSCR-B1  | SCRB        | 604         | 5.68              | 69517.88         | /              | 72-94/504-526         |
| PtriSCR-B2  | SCRB        | 590         | 8.45              | 66469.02         | /              | 63-85/496-518         |
| PtriSCR-B3  | SCRB        | 545         | 5.91              | 61327            | /              | 42-64                 |
| PtriSCR-B4  | SCRB        | 522         | 8.28              | 57028.09         | /              | 19-41/459-481         |
| PtriSCR-B5  | SCRB        | 507         | 5.84              | 57572.36         | /              | 7-29/477-499          |
| PtriSCR-B6  | SCRB        | 518         | 8.45              | 58660.57         | /              | 30-52/463-485         |
| PtriSCR-B7  | SCRB        | 579         | 6.45              | 66429.72         | /              | 9-28/485-507          |
| PtriSCR-B8  | SCRB        | 503         | 5.29              | 57645.22         | /              | 426-448               |
| PtriSCR-B9  | SCRB        | 526         | 8.89              | 60564.13         | /              | 13-32/464-486         |
| PtriSCR-B10 | SCRB        | 524         | 6.23              | 58760.42         | /              | 7-29/453-475          |
| PtriSCR-B11 | SCRB        | 525         | 8.57              | 58860.62         | /              | 9-31                  |
| SagrSCR-B1  | SCRB        | 525         | 6.51              | 59318.91         | /              | 32-54/477-499         |
| SagrSCR-B2  | SCRB        | 590         | 7.18              | 66413.82         | /              | 65-87/498-520         |
| SagrSCR-B3  | SCRB        | 534         | 5.85              | 60910.85         | /              | 45-67/480-502         |
| SagrSCR-B4  | SCRB        | 554         | 6.05              | 63835.03         | /              | 9-28/484-506          |
| SagrSCR-B5  | SCRB        | 522         | 8.83              | 59415.37         | /              | 10-32/431-449/464-483 |
| SagrSCR-B6  | SCRB        | 523         | 8.28              | 57204.21         | /              | 19-41/459-481         |
| SagrSCR-B7  | SCRB        | 527         | 8.98              | 60039.82         | /              | 9-31/463-485          |
| SagrSCR-B8  | SCRB        | 533         | 5.4               | 60839.65         | /              | 13-30/466-488         |
| SagrSCR-B9  | SCRB        | 603         | 6.2               | 69559.51         | /              | 77-99/509-531         |
| SagrSCR-B10 | SCRB        | 604         | 8.46              | 68335.28         | /              | 83-105/534-556        |
| SagrSCR-B11 | SCRB        | 495         | 7.94              | 56586.47         | /              | 7-29/469-491          |
| SbspSCR-B1  | SCRB        | 523         | 8.38              | 58386.22         | /              | 10-32/430-448/463-482 |
| SbspSCR-B2  | SCRB        | 523         | 7.58              | 59369.84         | /              | 7-26/453-475          |
| SbspSCR-B3  | SCRB        | 511         | 8.12              | 58316.11         | /              | 21-43                 |
| SbspSCR-B4  | SCRB        | 523         | 8.28              | 57964.2          | /              | 19-41/459-481         |
| SbspSCR-B5  | SCRB        | 593         | 8.23              | 66692.25         | /              | 63-85/496-518         |
| SbspSCR-B6  | SCRB        | 552         | 5.75              | 63619.57         | /              | 9-28/485-507          |
| SbspSCR-B7  | SCRB        | 496         | 8.97              | 56689.48         | /              | 7-29/442-464          |
| SbspSCR-B8  | SCRB        | 594         | 6.05              | 68191.91         | /              | 65-87/497-519         |
| SbspSCR-B9  | SCRB        | 509         | 5.82              | 57847.83         | /              | 13-35/434-456         |
| SbspSCR-B10 | SCRB        | 502         | 6.33              | 57462.91         | /              | 472-494               |

| Gene name   | Gene family | Length (aa) | Isoelectric point | Molecular weight | Signal peptide | Transmembrane Region |
|-------------|-------------|-------------|-------------------|------------------|----------------|----------------------|
| SbspSCR-B11 | SCRB        | 502         | 6.04              | 57304.15         | /              | 16-38/463-485        |
| SpspSCR-B1  | SCRB        | 524         | 8.28              | 57586.69         | /              | 19-41/460-482        |
| SpspSCR-B2  | SCRB        | 512         | 7.61              | 57916.33         | /              | 20-42/465-487        |
| SpspSCR-B3  | SCRB        | 534         | 6.77              | 60675.41         | /              | 13-30/457-479        |
| SpspSCR-B4  | SCRB        | 604         | 5.48              | 69299.75         | /              | 78-100/509-531       |
| SpspSCR-B5  | SCRB        | 501         | 6.23              | 56826.07         | /              | 12-34/470-492        |
| SpspSCR-B6  | SCRB        | 590         | 8.73              | 66528.22         | /              | 65-87/498-520        |
| SpspSCR-B7  | SCRB        | 569         | 5.58              | 64232.24         | /              | 85-107/517-539       |
| SpspSCR-B8  | SCRB        | 554         | 6.29              | 63415.57         | /              | 9-31/485-507         |
| SpspSCR-B9  | SCRB        | 527         | 8.66              | 59667.99         | /              | 9-31                 |
| SpspSCR-B10 | SCRB        | 405         | 5.97              | 45128.45         | /              | 337-359              |
| SpspSCR-B11 | SCRB        | 524         | 8.4               | 60288.77         | /              | 9-31/464-486         |
| WpumSCR-B1  | SCRB        | 528         | 8.82              | 60125.07         | /              | 9-31/466-484         |
| WpumSCR-B2  | SCRB        | 543         | 8.29              | 61448.42         | /              | 7-26/476-498         |
| WpumSCR-B3  | SCRB        | 538         | 8.27              | 59886.67         | /              | 19-41/459-481        |
| WpumSCR-B4  | SCRB        | 524         | 6.74              | 59484.24         | /              | 31-53/479-498        |
| WpumSCR-B5  | SCRB        | 458         | 8.37              | 52346.2          | /              | 430-452              |
| WpumSCR-B6  | SCRB        | 537         | 5.25              | 61081.78         | /              | 13-35/462-484        |
| WpumSCR-B7  | SCRB        | 588         | 6.84              | 66173.69         | /              | 63-85/493-515        |
| WpumSCR-B8  | SCRB        | 590         | 6.59              | 67675.28         | /              | 65-87/494-516        |
| WpumSCR-B9  | SCRB        | 557         | 8.86              | 63220.31         | /              | 82-104/510-532       |
| WpumSCR-B10 | SCRB        | 555         | 6.81              | 63669.74         | /              | 9-28/485-507         |
| CsolSCR-B1  | SCRB        | 582         | 5.82              | 66549.74         | /              | 56-78/486-508        |
| CsolSCR-B2  | SCRB        | 436         | 5.42              | 48932.3          | /              | /                    |
| CsolSCR-B3  | SCRB        | 401         | 6.14              | 45955.49         | /              | 332-354              |
| CsolSCR-B4  | SCRB        | 522         | 6.14              | 59259.97         | /              | 7-26/454-476         |
| CsolSCR-B5  | SCRB        | 302         | 6.39              | 34158.74         | /              | 7-29                 |
| CsolSCR-B6  | SCRB        | 455         | 6.77              | 51894.47         | /              | 373-395              |
| CsolSCR-B7  | SCRB        | 407         | 5.73              | 46518.81         | /              | 332-354              |
| CsolSCR-B8  | SCRB        | 224         | 7.64              | 24024.84         | /              | 158-180              |
| CsolSCR-B9  | SCRB        | 411         | 6.92              | 46755.08         | /              | 32-54/366-385        |
| CsolSCR-B10 | SCRB        | 566         | 4.86              | 65019.39         | /              | 514-536              |
| Abak_FREP   | FREP        | 607         | 7.59              | 67185.74         | 1-20           | /                    |
| Cfus_FREP   | FREP        | 642         | 6.66              | 72106.06         | 1-22           | /                    |
| Csol_FREP   | FREP        | 642         | 6.62              | 71982.13         | 1-21           | /                    |
| Dvas_FREP-1 | FREP        | 650         | 6.66              | 73174.26         | 1-21           | /                    |
| Ekon_FREP-1 | FREP        | 652         | 6.24              | 73837.92         | 1-20           | /                    |
| Ekon_FREP-2 | FREP        | 259         | 5.88              | 29805.62         | 1-16           | /                    |
| Ekon_FREP-3 | FREP        | 183         | 10.61             | 21490.7          | /              | /                    |
| Kgib_FREP-1 | FREP        | 724         | 9.64              | 83613.56         | /              | /                    |

| Gene name   | Gene family | Length (aa) | Isoelectric point | Molecular weight | Signal peptide | Transmembrane Region |
|-------------|-------------|-------------|-------------------|------------------|----------------|----------------------|
| Pcor_FREP-1 | FREP        | 654         | 6.27              | 73462.62         | 1-22           | /                    |
| Ptri_FREP   | FREP        | 618         | 8.87              | 67605.31         | 1-21           | /                    |
| Sagr_FREP-1 | FREP        | 648         | 7.6               | 71785.8          | 1-30           | 12-34                |
| Sbsp_FREP-1 | FREP        | 597         | 6.32              | 66479.78         | /              | /                    |
| Sbsp_FREP-2 | FREP        | 201         | 5.15              | 22449.92         | /              | /                    |
| Spsp_FREP   | FREP        | 647         | 6.35              | 72204.93         | 1-21           | /                    |
| Wpum_FREP   | FREP        | 652         | 6.05              | 73399.63         | 1-21           | /                    |
