# Supplementary material for: Genome-Wide Analysis of Gene Families of Pattern Recognition Receptors in Fig Wasps (Hymenoptera, Chalcidoidea)
Source: MDPI journal article supplement (doi:10.3390/genes12121952), 2021-12-05
Supplement: s1 [file s1]

**Table S1.** The fig wasp species of pollinators and non-pollinators used in this study.

| Group           | Species                          | Abbreviation |
|-----------------|----------------------------------|--------------|
| Pollinators     | <i>Ceratosolen solmsi</i>        | Csol         |
|                 | <i>Kradibia gibbosae</i>         | Kgib         |
|                 | <i>Wiebesia pumilae</i>          | Wpum         |
|                 | <i>Ceratosolen fusciceps</i>     | Cfus         |
|                 | <i>Dolichoris vasculosae</i>     | Dvas         |
|                 | <i>Eupristina koningsbergeri</i> | Ekon         |
|                 | <i>Platyscapa corneri</i>        | Pcor         |
| Non-pollinators | <i>Sycobia</i> sp.2              | Sbsp         |
|                 | <i>Sycophila</i> sp.2            | SpSP         |
|                 | <i>Sycophaga agraensis</i>       | Sagr         |
|                 | <i>Apocrypta bakeri</i>          | Abak         |
|                 | <i>Philotrypesis tridentate</i>  | Ptri         |
